# Supplementary material
Source: publisher figshare collection journal article supplement (https://gsapubs.figshare.com/ndownloader/files/22745363)

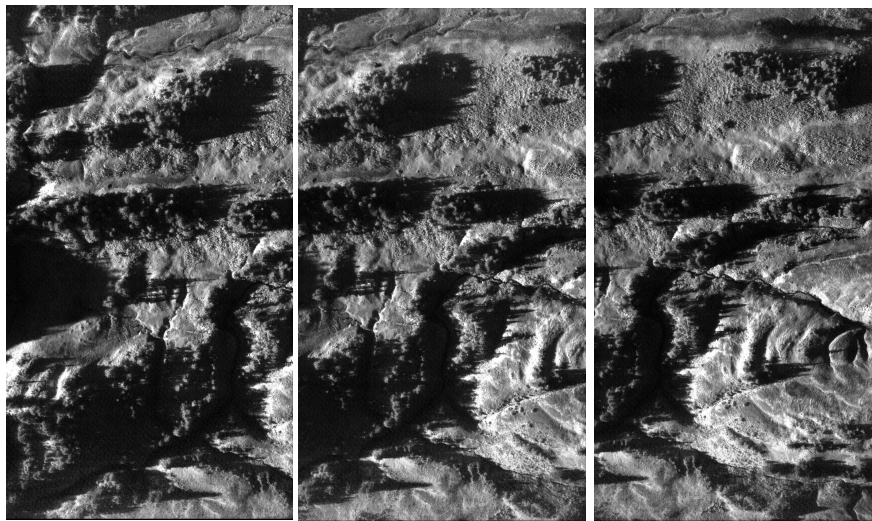

6a.

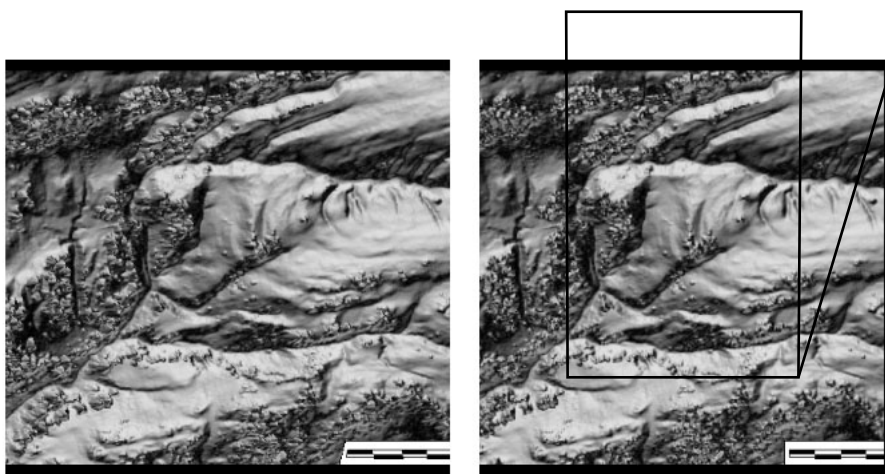

6b.

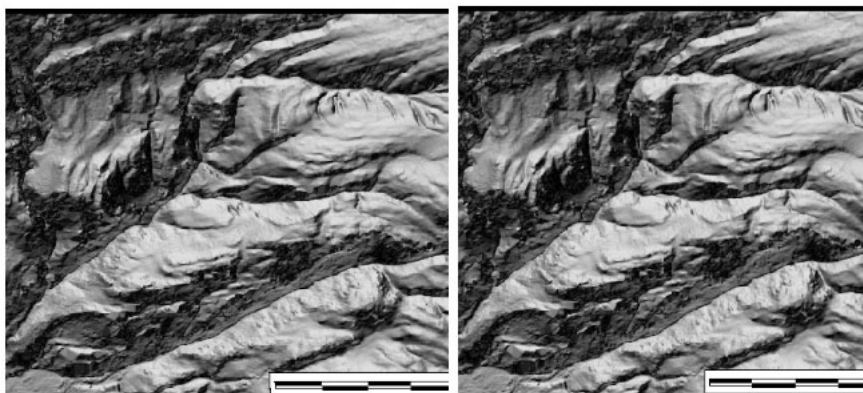

6c.

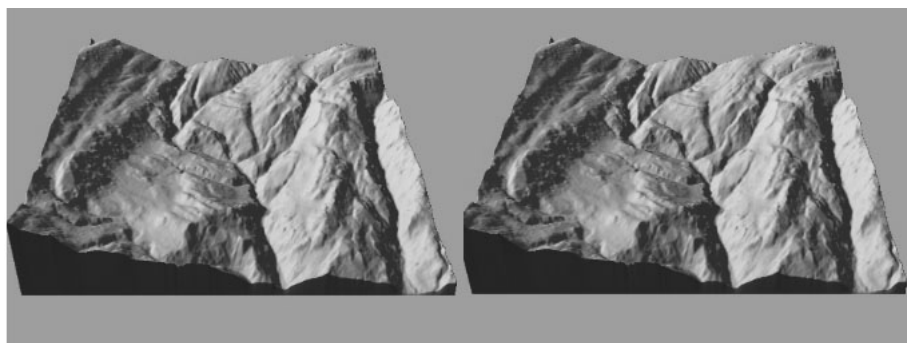

6d.

Supplement: Supplementary file 1 [file 22745363]
